# Supplementary material
Source: PubMed Central journal article supplement (PMC4305026)
Supplement: NIHMS638927-supplement-Supplemental_Digital_Content.pdf [file NIHMS638927-supplement-Supplemental_Digital_Content.pdf]

| <b>Gene</b>   | <b>Coding Mutations Detected</b>                                                                                                                                                                                                                                                                                                                                                                                                                                                                                                                                                                                                                                                                                 |
|---------------|------------------------------------------------------------------------------------------------------------------------------------------------------------------------------------------------------------------------------------------------------------------------------------------------------------------------------------------------------------------------------------------------------------------------------------------------------------------------------------------------------------------------------------------------------------------------------------------------------------------------------------------------------------------------------------------------------------------|
| <b>AKT1</b>   | E17K                                                                                                                                                                                                                                                                                                                                                                                                                                                                                                                                                                                                                                                                                                             |
| <b>ALK</b>    | C1156Y, L1196M                                                                                                                                                                                                                                                                                                                                                                                                                                                                                                                                                                                                                                                                                                   |
| <b>BRAF</b>   | D594G/V, G469S/E/A/V, L597Q/V, V600E/K/M                                                                                                                                                                                                                                                                                                                                                                                                                                                                                                                                                                                                                                                                         |
| <b>DDR2</b>   | C580Y, D125Y, G253C, G505S, G774E/V, I120M, I638F, L239R, L63V, T765P                                                                                                                                                                                                                                                                                                                                                                                                                                                                                                                                                                                                                                            |
| <b>EGFR</b>   | R108K, T263P, A289V, G598V, E709K/H, E709A/G/V, G719S/C/A/D, G719S/C/A/D, M766_A767insAl, D761Y/N, S768I, R776C/H, V769_D770insASV, V769_D770insCV, D770_N771>AGG/V769_D770insASV/V769_D770insASV, D770_N771insG, N771_P772>SVDNR, P772_H773insV, H773>NPY, H773_V774insNPH/PH/H, V774L, V774_C775insHV, T790M, L858R/M, L861Q, E746_T751del, E746_A750del, E746_T751del, E746_T751del, S752D, L747_E749del, L747_T750del, L747_S752del, L747_T751del, L747_S752del, P753S, A750P, T751A, T751P, T751I, S752I/F, S752_I759del, L747_Q ins, E746_T751del, I ins (combined), E746_A750del, T751A (combined), L747_E749del, A750P (combined), L747_T750del, P ins (combined), L747_S752del, Q ins (combined), T854A |
| <b>EPHA3</b>  | A435S, D446Y, S449F, D806N, G187R, G518L, K761N, G766E, M269I, N379K, N85S, S229Y, T166N, T37K, T393K, W250R                                                                                                                                                                                                                                                                                                                                                                                                                                                                                                                                                                                                     |
| <b>EPHA5</b>  | D493Y, G582E, M1034I, N1032S, R1007Q, S566Y, S810I, T856I                                                                                                                                                                                                                                                                                                                                                                                                                                                                                                                                                                                                                                                        |
| <b>ERBB2</b>  | M774_A775insAYVM, A775_G776insAYVM                                                                                                                                                                                                                                                                                                                                                                                                                                                                                                                                                                                                                                                                               |
| <b>FGFR4</b>  | P672T, H192fs*19                                                                                                                                                                                                                                                                                                                                                                                                                                                                                                                                                                                                                                                                                                 |
| <b>JAK2</b>   | L609S, P503L, R1122P, Y931C                                                                                                                                                                                                                                                                                                                                                                                                                                                                                                                                                                                                                                                                                      |
| <b>KRAS</b>   | G12S/V/F/R/A/C/D, G13C/S/A/V/D, Q61L/R/P/H/E/K                                                                                                                                                                                                                                                                                                                                                                                                                                                                                                                                                                                                                                                                   |
| <b>MAP2K1</b> | D67N, K57N, Q56P                                                                                                                                                                                                                                                                                                                                                                                                                                                                                                                                                                                                                                                                                                 |
| <b>STK11</b>  | A347fs*13, A43_L50del6, D327fs*10, E120*, E165*, E223*, E70*, E70fs*26, F354L, G163C, G188fs*99, G196V, G56fs*4, G56W, G91L, H174R, I26fs*25, K191*, K78E, L285Q, L50_D53del4, M51fs*14, P179L, Q123R, Q137*, Q159*, Q170*, Q220*, Q37L, R426W, R86G, V197fs*69, V236fs*30, Y272Y                                                                                                                                                                                                                                                                                                                                                                                                                                |
| <b>MET</b>    | N375S, 982_1028del47                                                                                                                                                                                                                                                                                                                                                                                                                                                                                                                                                                                                                                                                                             |
| <b>NOTCH1</b> | H2276fs*79, D1643H, R2328W, T1997M, V1671I, V2444fs*35                                                                                                                                                                                                                                                                                                                                                                                                                                                                                                                                                                                                                                                           |
| <b>NRAS</b>   | Q61E/K/H/L/R/P                                                                                                                                                                                                                                                                                                                                                                                                                                                                                                                                                                                                                                                                                                   |
| <b>NRF2</b>   | D29H, D77N/A, E79Q/K/G, G31A, G81D, R34Q                                                                                                                                                                                                                                                                                                                                                                                                                                                                                                                                                                                                                                                                         |
| <b>NTRK1</b>  | Q80*, R119H, S326R                                                                                                                                                                                                                                                                                                                                                                                                                                                                                                                                                                                                                                                                                               |
| <b>NTRK2</b>  | Q666R, C45F, G261R, L138F, L670M, L755L                                                                                                                                                                                                                                                                                                                                                                                                                                                                                                                                                                                                                                                                          |
| <b>NTRK3</b>  | I769N, L152I, L248M, L270M, L336Q, S184C, T283K, V307L, R271F                                                                                                                                                                                                                                                                                                                                                                                                                                                                                                                                                                                                                                                    |
| <b>PIK3CA</b> | E542Q/K, E545Q/K, H1047Y/R/L                                                                                                                                                                                                                                                                                                                                                                                                                                                                                                                                                                                                                                                                                     |
| <b>PTCH1</b>  | R1308G, R682L, S1326fs*46                                                                                                                                                                                                                                                                                                                                                                                                                                                                                                                                                                                                                                                                                        |
| <b>PTEN</b>   | R233*                                                                                                                                                                                                                                                                                                                                                                                                                                                                                                                                                                                                                                                                                                            |
| <b>PTPN11</b> | E76V                                                                                                                                                                                                                                                                                                                                                                                                                                                                                                                                                                                                                                                                                                             |
| <b>PTPRD</b>  | S1703R, T337A, V483E                                                                                                                                                                                                                                                                                                                                                                                                                                                                                                                                                                                                                                                                                             |
| <b>TP53</b>   | G245C/S, G245D/V, R158C/G/L/P, R175L/H, R248G/L/Q/W, R249S/W/M, R273C/H/L/P, R282G/W, V157F, Y163C, R175L/H, Y220C                                                                                                                                                                                                                                                                                                                                                                                                                                                                                                                                                                                               |

**Supplementary Table 1. List of gene-specific coding mutations analyzed.** Abbreviations: fs, frame shift; ins, insertion; del, deletion; \*, nonsense. Amino Acids: A, Alanine; R, Arginine; N, Asparagine; D, Aspartate; C, Cysteine; E, Glutamate; Q, Glutamine; G, Glycine; H, Histidine; I, Isoleucine; L, Leucine; M, Methionine; F, Phenylalanine; P, proline; S, Serine; T, Threonine; W, Tryptophan; Y, Tyrosine; V, Valine.

**Supplementary Table 2. Logistic regression for odds ratio of having 1 or more mutations by race, adjusted for covariates.**

| <b>Variable</b>                                            | <b>Odds ratio</b> | <b>Lower 95%<br/>CI</b> | <b>Upper 95%<br/>CI</b> | <b>P value</b> |
|------------------------------------------------------------|-------------------|-------------------------|-------------------------|----------------|
| <b>Race Black</b>                                          | <b>0.582</b>      | <b>0.363</b>            | <b>0.933</b>            | <b>0.025</b>   |
| <b>Gender Female</b>                                       | <b>1.815</b>      | <b>1.200</b>            | <b>2.747</b>            | <b>0.005</b>   |
| <b>Age</b>                                                 | <b>1.008</b>      | <b>0.989</b>            | <b>1.028</b>            | <b>0.411</b>   |
| <b>Stagell</b>                                             | <b>1.379</b>      | <b>0.827</b>            | <b>2.299</b>            | <b>0.218</b>   |
| <b>Stagell,IV</b>                                          | <b>0.986</b>      | <b>0.586</b>            | <b>1.658</b>            | <b>0.957</b>   |
| <b>Histology NSCLC</b>                                     | <b>0.574</b>      | <b>0.302</b>            | <b>1.091</b>            | <b>0.090</b>   |
| <b>Histology Squamous</b>                                  | <b>0.583</b>      | <b>0.374</b>            | <b>0.909</b>            | <b>0.017</b>   |
| <b>Smoke Never</b>                                         | <b>1.083</b>      | <b>0.517</b>            | <b>2.268</b>            | <b>0.834</b>   |
| <b>Smoke Unknown</b>                                       | <b>1.303</b>      | <b>0.665</b>            | <b>2.553</b>            | <b>0.440</b>   |
| <b>Reference groups: stagel, adenocarcinoma or smoker.</b> |                   |                         |                         |                |

**Supplementary Table 3. SNP allele frequency in NSCLC compared to NHLBI ESP population database.**

|                | <b>Gene variant</b>    | <b>Allele Frequency NHLBI ESP</b> | <b>Allele Frequency NSCLC Current Study</b> | <b>P value</b> |
|----------------|------------------------|-----------------------------------|---------------------------------------------|----------------|
| <b>Blacks:</b> | <i>MET</i> (N375S)     | 26/3854(1%)                       | 1/274(0%)                                   | 1.000          |
|                | <i>NOTCH1</i> (V1671I) | 56/3128(2%)                       | 12/274(4%)                                  | 0.010          |
|                | <i>STK11</i> (Y272Y)   | 293/3938(7%)                      | 21/274(8%)                                  | 0.905          |
| <b>Whites:</b> | <i>MET</i> (N375S)     | 151/8278(2%)                      | 19/670(3%)                                  | 0.076          |
|                | <i>NOTCH1</i> (V1671I) | 2/6752(0%)                        | 0/670(0%)                                   | 1.000          |
|                | <i>STK11</i> (Y272Y)   | 6/8258(0%)                        | 1/670(0%)                                   | 0.421          |

**Abbreviations: SNP, single nucleotide polymorphism; NSCLC, non-small cell lung cancer; NHLBI ESP, National Institutes of Health Heart, Lung and Blood Institute (NHLBI) Grand Opportunity (GO) Exome Sequencing 6,500 Project**

**Supplementary Table 4. Frequency of specific mutations identified in tumor tissue among 472 patients by histology.**

| <b>gene</b>   | <b>variant</b>      | <b>Adeno</b>   | <b>Squamous</b> | <b>NSCLC</b>  | <b>P value</b>   |
|---------------|---------------------|----------------|-----------------|---------------|------------------|
| <b>KRAS</b>   | <b>G12C</b>         | <b>22 (9%)</b> | <b>1 (1%)</b>   | <b>2 (4%)</b> | <b>&lt;0.001</b> |
| <b>KRAS</b>   | <b>G12V</b>         | <b>10 (4%)</b> | <b>0 (0%)</b>   | <b>1 (2%)</b> | <b>0.016</b>     |
| <b>TP53</b>   | <b>R249S</b>        | <b>0 (0%)</b>  | <b>4 (2%)</b>   | <b>0 (0%)</b> | <b>0.029</b>     |
| <b>PIK3CA</b> | <b>E545K</b>        | <b>0 (0%)</b>  | <b>4 (2%)</b>   | <b>0 (0%)</b> | <b>0.029</b>     |
| <b>EGFR</b>   | <b>E746-A750del</b> | <b>11 (4%)</b> | <b>1 (1%)</b>   | <b>0 (0%)</b> | <b>0.036</b>     |
